# Supplementary material for: Early Rise of Blood T Follicular Helper Cell Subsets and Baseline Immunity as Predictors of Persisting Late Functional Antibody Responses to Vaccination in Humans
Source: PubMed Central journal article supplement (PMC4918887; doi:10.1371/journal.pone.0157066), 2016-06-23
Supplement: pone.0157066.s008.pdf [file pone.0157066.s008.pdf]

S1 Table HI titers

Antigen: A/California/7/2009

Antigen: A/Victoria/361/2011

| Sample ID | Geometric Mean HAI titre |      |       |        | Geometric Mean HAI titre |      |       |        |
|-----------|--------------------------|------|-------|--------|--------------------------|------|-------|--------|
|           | DAY0                     | DAY7 | DAY21 | DAY168 | DAY0                     | DAY7 | DAY21 | DAY168 |
| 9001      | 5                        | 640  | 320   | N/A    | 5                        | 640  | 320   | N/A    |
| 9004      | 20                       | 320  | 640   | N/A    | 10                       | 160  | 160   | N/A    |
| 9010      | 5                        | 320  | 320   | 80     | 5                        | 160  | 160   | 40     |
| 9011      | 5                        | 5    | 5     | 5      | 5                        | 5    | 5     | 5      |
| 9012      | 20                       | 80   | 135   | 40     | 80                       | 160  | 320   | 160    |
| 9014      | 5                        | 761  | 1280  | 640    | 160                      | 320  | 640   | 453    |
| 9015      | 40                       | 80   | 80    | 40     | 40                       | 80   | 80    | 40     |
| 9017      | 20                       | 640  | 905   | 320    | 20                       | 80   | 160   | 80     |
| 9018      | 10                       | 80   | 40    | 20     | 80                       | 320  | 320   | 80     |
| 9021      | 5                        | 80   | 320   | 160    | 14                       | 80   | 160   | 80     |
| 9022      | 5                        | 40   | 40    | N/A    | 5                        | 5    | 5     | N/A    |
| 9024      | 5                        | 5    | 5     | N/A    | 5                        | 5    | 5     | N/A    |
| 9026      | 320                      | 453  | 453   | 320    | 40                       | 160  | 160   | 57     |
| 9027      | 80                       | 320  | 320   | 160    | 5                        | 80   | 80    | 40     |
| 9028      | 10                       | 80   | 80    | 40     | 5                        | 5    | 5     | 5      |
| 9031      | 5                        | 1280 | 1280  | 320    | 5                        | 1280 | 1076  | 80     |
| 9033      | 80                       | 320  | 320   | 160    | 14                       | 40   | 40    | 40     |
| 9035      | 5                        | 5    | 5     | 5      | 10                       | 80   | 160   | 40     |
| 9036      | 5                        | 5    | 5     | N/A    | 5                        | 5    | 5     | N/A    |
| 9038      | 5                        | 5    | 5     | N/A    | 5                        | 5    | 5     | N/A    |
| 9041      | 7                        | 1280 | 1280  | 226    | 10                       | 80   | 80    | 40     |
| 9043      | 5                        | 640  | 640   | N/A    | 5                        | 320  | 320   | N/A    |
| 9044      | 5                        | 1280 | 1280  | N/A    | 5                        | 160  | 640   | N/A    |
| 9045      | 160                      | 1280 | 1280  | 453    | 5                        | 640  | 640   | 640    |
| 9046      | 10                       | 80   | 160   | 80     | 20                       | 538  | 640   | 160    |
| 9050      | 5                        | 1280 | 1280  | 226    | 80                       | 226  | 320   | 160    |
| 9051      | 5                        | 5    | 80    | N/A    | 5                        | 5    | 80    | N/A    |
| 9055      | 5                        | 5    | 5     | 5      | 5                        | 5    | 5     | 5      |
| 9056      | 80                       | 160  | 190   | 160    | 226                      | 320  | 320   | 160    |
| 9057      | 20                       | 1280 | 640   | 20     | 12                       | 320  | 160   | 14     |
| 9060      | 20                       | 135  | 640   | N/A    | 20                       | 40   | 226   | N/A    |
| 9061      | 28                       | 95   | 190   | N/A    | 80                       | 135  | 320   | N/A    |
| 9062      | 160                      | 320  | 269   | 226    | 5                        | 761  | 1280  | 640    |
| 9063      | 160                      | 1280 | 1280  | 640    | 40                       | 320  | 190   | 160    |
| 9065      | 57                       | 320  | 640   | 320    | 40                       | 160  | 320   | 226    |
| 9066      | 226                      | 640  | 640   | 320    | 640                      | 640  | 1280  | 640    |
| 9068      | 113                      | 640  | 381   | 320    | 5                        | 381  | 1280  | 640    |
| 9069      | 5                        | 5    | 640   | 57     | 80                       | 80   | 761   | 320    |
| 9071      | 5                        | 113  | 320   | 320    | 320                      | 320  | 320   | 160    |
| 9072      | 640                      | 905  | 761   | N/A    | 160                      | 538  | 640   | N/A    |
| 9073      | 24                       | 1280 | 1280  | 453    | 24                       | 640  | 640   | 320    |
| 9074      | 5                        | 5    | 5     | 5      | 5                        | 5    | 5     | 5      |
| 9078      | 14                       | 226  | 320   | 160    | 5                        | 57   | 135   | 28     |

|      |     |      |      |     |    |     |      |     |
|------|-----|------|------|-----|----|-----|------|-----|
| 9080 | 160 | 160  | 160  | 160 | 5  | 5   | 5    | 5   |
| 9081 | 5   | 5    | 5    | N/A | 5  | 5   | 5    | N/A |
| 9082 | 80  | 80   | 113  | 160 | 10 | 40  | 160  | 80  |
| 9083 | 5   | 1280 | 1280 | N/A | 5  | 640 | 1280 | N/A |
| 9088 | 40  | 67   | 67   | N/A | 20 | 40  | 40   | N/A |
| 9091 | 5   | 80   | 160  | 80  | 5  | 5   | 5    | 5   |

**Antigen: B/HubeiWujiagang/158/2009**

| <b>Geometric Mean HAI titre</b> |             |              |               |
|---------------------------------|-------------|--------------|---------------|
| <b>DAY0</b>                     | <b>DAY7</b> | <b>DAY21</b> | <b>DAY168</b> |
| 7                               | 80          | 57           | N/A           |
| 5                               | 453         | 320          | N/A           |
| 5                               | 160         | 113          | 80            |
| 5                               | 5           | 5            | 5             |
| 5                               | 5           | 5            | 5             |
| 5                               | 7           | 67           | 5             |
| 5                               | 5           | 40           | 20            |
| 5                               | 40          | 160          | 40            |
| 20                              | 80          | 80           | 20            |
| 5                               | 5           | 5            | 5             |
| 5                               | 5           | 5            | N/A           |
| 5                               | 5           | 5            | N/A           |
| 20                              | 40          | 40           | 40            |
| 5                               | 80          | 48           | 20            |
| 5                               | 160         | 160          | 80            |
| 5                               | 226         | 160          | 80            |
| 5                               | 40          | 80           | 40            |
| 5                               | 5           | 20           | 7             |
| 5                               | 5           | 5            | N/A           |
| 5                               | 5           | 5            | N/A           |
| 5                               | 40          | 5            | 5             |
| 10                              | 320         | 640          | N/A           |
| 20                              | 80          | 80           | N/A           |
| 5                               | 160         | 160          | 80            |
| 5                               | 40          | 57           | 28            |
| 5                               | 40          | 40           | 10            |
| 20                              | 34          | 40           | N/A           |
| 5                               | 5           | 5            | 5             |
| 20                              | 40          | 40           | 28            |
| 5                               | 20          | 10           | 5             |
| 5                               | 5           | 5            | N/A           |
| 5                               | 5           | 40           | N/A           |
| 5                               | 226         | 160          | 80            |
| 5                               | 160         | 160          | 40            |
| 5                               | 5           | 5            | 5             |
| 57                              | 80          | 160          | 80            |
| 5                               | 640         | 320          | 80            |
| 5                               | 5           | 135          | 20            |
| 5                               | 80          | 80           | 40            |
| 5                               | 5           | 5            | N/A           |
| 40                              | 160         | 160          | 80            |
| 5                               | 5           | 5            | 5             |
| 5                               | 320         | 640          | 320           |

|    |    |     |     |
|----|----|-----|-----|
| 5  | 5  | 5   | 5   |
| 5  | 5  | 5   | N/A |
| 10 | 40 | 160 | 160 |
| 5  | 5  | 5   | N/A |
| 5  | 10 | 5   | N/A |
| 5  | 5  | 5   | 5   |
