# Supplementary material for: Early Rise of Blood T Follicular Helper Cell Subsets and Baseline Immunity as Predictors of Persisting Late Functional Antibody Responses to Vaccination in Humans
Source: PubMed Central journal article supplement (PMC4918887; doi:10.1371/journal.pone.0157066), 2016-06-23
Supplement: pone.0157066.s009.pdf [file pone.0157066.s009.pdf]

**S3 Table Frequency of Plasmablasts**X10<sup>6</sup> PBMCs

SAMPLE || PATIENT ID

|             |      |      |
|-------------|------|------|
| 9004 day 0  | TIIV | 421  |
| 9004 day 7  | TIIV | 1635 |
| 9004 day 28 | TIIV | 96   |
| 9017 day 0  | TIIV | 997  |
| 9017 day 7  | TIIV | 3306 |
| 9017 day 28 | TIIV | 446  |
| 9018 day 0  | TIIV | 266  |
| 9018 day 7  | TIIV | 443  |
| 9018 day 28 | TIIV | 360  |
| 9021 day 0  | TIIV | 669  |
| 9021 day 7  | TIIV | 688  |
| 9021 day 28 | TIIV | 364  |
| 9027 day 0  | TIIV | 438  |
| 9027 day 7  | TIIV | 828  |
| 9027 day 28 | TIIV | 386  |
| 9028 day 0  | TIIV | 928  |
| 9028 day 7  | TIIV | 5390 |
| 9028 day 28 | TIIV | 1475 |
| 9033 day 0  | TIIV | 43   |
| 9033 day 7  | TIIV | 1500 |
| 9033 day 28 | TIIV | 73   |
| 9035 day 0  | TIIV | 428  |
| 9035 day 7  | TIIV | 675  |
| 9035 day 28 | TIIV | 277  |
| 9045 day 0  | TIIV | N/A  |
| 9045 day 7  | TIIV | N/A  |
| 9045 day 28 | TIIV | N/A  |
| 9051 day 0  | TIIV | N/A  |
| 9051 day 7  | TIIV | N/A  |
| 9051 day 28 | TIIV | N/A  |
| 9055 day 0  | TIIV | N/A  |
| 9055 day 7  | TIIV | N/A  |
| 9055 day 28 | TIIV | N/A  |
| 9057 day 0  | TIIV | 255  |
| 9057 day 7  | TIIV | 1454 |
| 9057 day 28 | TIIV | 241  |
| 9061 day 0  | TIIV | 1748 |
| 9061 day 7  | TIIV | 3613 |
| 9061 day 28 | TIIV | 734  |
| 9062 day 0  | TIIV | 328  |
| 9062 day 7  | TIIV | 872  |

|             |       |      |
|-------------|-------|------|
| 9062 day 28 | TIIV  | 238  |
| 9065 day 0  | TIIV  | 188  |
| 9065 day 7  | TIIV  | 1128 |
| 9065 day 28 | TIIV  | 131  |
| 9071 day 0  | TIIV  | 204  |
| 9071 day 7  | TIIV  | 877  |
| 9071 day 28 | TIIV  | 212  |
| 9083 day 0  | TIIV  | 289  |
| 9083 day 7  | TIIV  | 1453 |
| 9083 day 28 | TIIV  | 894  |
| 9091 day 0  | TIIV  | 1143 |
| 9091 day 7  | TIIV  | 2595 |
| 9091 day 28 | TIIV  | 1342 |
| 9010 day 0  | ATIIV | 1418 |
| 9010 day 7  | ATIIV | 5686 |
| 9010 day 28 | ATIIV | 1223 |
| 9026 day 0  | ATIIV | 209  |
| 9026 day 7  | ATIIV | 370  |
| 9026 day 28 | ATIIV | 248  |
| 9031 day 0  | ATIIV | 140  |
| 9031 day 7  | ATIIV | 580  |
| 9031 day 28 | ATIIV | 43   |
| 9041 day 0  | ATIIV | 68   |
| 9041 day 7  | ATIIV | 1355 |
| 9041 day 28 | ATIIV | 102  |
| 9043 day 0  | ATIIV | 0    |
| 9043 day 7  | ATIIV | 4185 |
| 9043 day 28 | ATIIV | 165  |
| 9044 day 0  | ATIIV | 338  |
| 9044 day 7  | ATIIV | 7472 |
| 9044 day 28 | ATIIV | 342  |
| 9046 day 0  | ATIIV | 633  |
| 9046 day 7  | ATIIV | 6505 |
| 9046 day 28 | ATIIV | 447  |
| 9050 day 0  | ATIIV | 667  |
| 9050 day 7  | ATIIV | 1024 |
| 9050 day 28 | ATIIV | N/A  |
| 9056 day 0  | ATIIV | 660  |
| 9056 day 7  | ATIIV | N/A  |
| 9056 day 28 | ATIIV | 117  |
| 9063 day 0  | ATIIV | 340  |
| 9063 day 7  | ATIIV | 1516 |
| 9063 day 28 | ATIIV | 253  |
| 9066 day 0  | ATIIV | 107  |

|             |         |      |
|-------------|---------|------|
| 9066 day 7  | ATIIV   | 262  |
| 9066 day 28 | ATIIV   | 81   |
| 9068 day 0  | ATIIV   | 370  |
| 9068 day 7  | ATIIV   | 2519 |
| 9068 day 28 | ATIIV   | 643  |
| 9069 day 0  | ATIIV   | 320  |
| 9069 day 7  | ATIIV   | 2323 |
| 9069 day 28 | ATIIV   | 274  |
| 9073 day 0  | ATIIV   | 122  |
| 9073 day 7  | ATIIV   | 1579 |
| 9073 day 28 | ATIIV   | 204  |
| 9078 day 0  | ATIIV   | 255  |
| 9078 day 7  | ATIIV   | 1927 |
| 9078 day 28 | ATIIV   | 178  |
| 9082 day 0  | ATIIV   | 266  |
| 9082 day 7  | ATIIV   | 1757 |
| 9082 day 28 | ATIIV   | 362  |
| 9088 day 0  | ATIIV   | 1756 |
| 9088 day 7  | ATIIV   | 728  |
| 9088 day 28 | ATIIV   | 858  |
| 9022 day 0  | PLACEBO | 319  |
| 9022 day 7  | PLACEBO | 434  |
| 9022 day 28 | PLACEBO | 775  |
| 9024 day 0  | PLACEBO | 414  |
| 9024 day 7  | PLACEBO | 650  |
| 9024 day 28 | PLACEBO | 447  |
| 9036 day 0  | PLACEBO | 822  |
| 9036 day 7  | PLACEBO | 1750 |
| 9036 day 28 | PLACEBO | 670  |
| 9038 day 0  | PLACEBO | 381  |
| 9038 day 7  | PLACEBO | 1084 |
| 9038 day 28 | PLACEBO | 256  |
| 9074 day 0  | PLACEBO | 449  |
| 9074 day 7  | PLACEBO | 352  |
| 9074 day 28 | PLACEBO | 477  |
| 9080 day 0  | PLACEBO | 174  |
| 9080 day 7  | PLACEBO | 214  |
| 9080 day 28 | PLACEBO | 259  |
| 9081 day 0  | PLACEBO | 237  |
| 9081 day 7  | PLACEBO | 245  |
| 9081 day 28 | PLACEBO | 719  |

\*Number of CD20-/CD27++CD38++
