# Supplementary material for: Early Rise of Blood T Follicular Helper Cell Subsets and Baseline Immunity as Predictors of Persisting Late Functional Antibody Responses to Vaccination in Humans
Source: PubMed Central journal article supplement (PMC4918887; doi:10.1371/journal.pone.0157066), 2016-06-23
Supplement: pone.0157066.s010.pdf [file pone.0157066.s010.pdf]

**S4 Table Frequency of Antigen-specific T cells**

| SAMPLE ID | PATIENT | IC | Time point | Vaccine | CD4+ICOS+                |                 |                    |
|-----------|---------|----|------------|---------|--------------------------|-----------------|--------------------|
|           |         |    |            |         | CD4+ICOS+C<br>XCR5-IL21+ | CXCR5+<br>IL21+ | CD4+ICOS+I<br>L21+ |
| 9017      | medium  |    | day 0      | TIIV    | 0.00                     | 0.00            | 0.00               |
| 9017      | H1N1    |    | day 0      | TIIV    | 91.86                    | 6.54            | 98.40              |
| 9017      | SEB     |    | day 0      | TIIV    | 699.98                   | 0.00            | 699.98             |
| 9017      | medium  |    | day 7      | TIIV    | 0.00                     | 0.00            | 0.00               |
| 9017      | H1N1    |    | day 7      | TIIV    | 391.91                   | 97.84           | 489.75             |
| 9017      | SEB     |    | day 7      | TIIV    | 967.33                   | 0.00            | 967.33             |
| 9017      | medium  |    | day 28     | TIIV    | 0.00                     | 0.00            | 0.00               |
| 9017      | H1N1    |    | day 28     | TIIV    | 85.30                    | 38.34           | 123.64             |
| 9017      | SEB     |    | day 28     | TIIV    | 831.00                   | 0.00            | 831.00             |
| 9018      | medium  |    | day 0      | TIIV    | 0.00                     | 0.00            | 0.00               |
| 9018      | H1N1    |    | day 0      | TIIV    | 14.22                    | 4.61            | 18.83              |
| 9018      | SEB     |    | day 0      | TIIV    | 204.58                   | 61.12           | 265.70             |
| 9018      | medium  |    | day 7      | TIIV    | 0.00                     | 0.00            | 0.00               |
| 9018      | H1N1    |    | day 7      | TIIV    | 14.82                    | 4.88            | 19.70              |
| 9018      | SEB     |    | day 7      | TIIV    | 69.70                    | 46.50           | 116.20             |
| 9018      | medium  |    | day 28     | TIIV    | 0.00                     | 0.00            | 0.00               |
| 9018      | H1N1    |    | day 28     | TIIV    | 6.34                     | 6.07            | 12.41              |
| 9018      | SEB     |    | day 28     | TIIV    | 6.90                     | 0.00            | 6.90               |
| 9021      | medium  |    | day 0      | TIIV    | 0.00                     | 0.00            | 0.00               |
| 9021      | H1N1    |    | day 0      | TIIV    | 44.83                    | 12.21           | 57.04              |
| 9021      | SEB     |    | day 0      | TIIV    | 730.83                   | 41.65           | 772.48             |
| 9021      | medium  |    | day 7      | TIIV    | 0.00                     | 0.00            | 0.00               |
| 9021      | H1N1    |    | day 7      | TIIV    | 61.43                    | 20.43           | 81.86              |
| 9021      | SEB     |    | day 7      | TIIV    | 718.63                   | 101.40          | 820.03             |
| 9021      | medium  |    | day 28     | TIIV    | 0.00                     | 0.00            | 0.00               |
| 9021      | H1N1    |    | day 28     | TIIV    | 163.57                   | 5.15            | 168.72             |
| 9021      | SEB     |    | day 28     | TIIV    | 950.86                   | 38.40           | 989.26             |
| 9027      | medium  |    | day 0      | TIIV    | 0.00                     | 0.00            | 0.00               |
| 9027      | H1N1    |    | day 0      | TIIV    | 80.72                    | 0.01            | 80.73              |
| 9027      | SEB     |    | day 0      | TIIV    | 3667.74                  | 25.80           | 3693.54            |
| 9027      | medium  |    | day 7      | TIIV    | 0.00                     | 0.00            | 0.00               |
| 9027      | H1N1    |    | day 7      | TIIV    | 55.78                    | 30.44           | 86.22              |
| 9027      | SEB     |    | day 7      | TIIV    | 2588.90                  | 18.90           | 2607.80            |
| 9027      | medium  |    | day 28     | TIIV    | 0.00                     | 0.00            | 0.00               |
| 9027      | H1N1    |    | day 28     | TIIV    | 136.10                   | 36.59           | 172.69             |
| 9027      | SEB     |    | day 28     | TIIV    | 2103.03                  | 13.69           | 2116.72            |
| 9028      | medium  |    | day 0      | TIIV    | 0.00                     | 0.00            | 0.00               |
| 9028      | H1N1    |    | day 0      | TIIV    | 46.20                    | 9.49            | 55.69              |
| 9028      | SEB     |    | day 0      | TIIV    | 1281.01                  | 84.91           | 1365.92            |
| 9028      | medium  |    | day 7      | TIIV    | 0.00                     | 0.00            | 0.00               |
| 9028      | H1N1    |    | day 7      | TIIV    | 102.10                   | 17.40           | 119.50             |
| 9028      | SEB     |    | day 7      | TIIV    | 1454.40                  | 45.90           | 1500.30            |
| 9028      | medium  |    | day 28     | TIIV    | 0.00                     | 0.00            | 0.00               |
| 9028      | H1N1    |    | day 28     | TIIV    | 93.53                    | 48.64           | 142.17             |
| 9028      | SEB     |    | day 28     | TIIV    | 1115.71                  | 119.46          | 1235.17            |
| 9033      | medium  |    | day 0      | TIIV    | 0.00                     | 0.00            | 0.00               |
| 9033      | H1N1    |    | day 0      | TIIV    | 48.43                    | 17.99           | 66.42              |
| 9033      | SEB     |    | day 0      | TIIV    | 382.21                   | 12.50           | 394.71             |
| 9033      | medium  |    | day 7      | TIIV    | 0.00                     | 0.00            | 0.00               |
| 9033      | H1N1    |    | day 7      | TIIV    | 62.47                    | 15.99           | 78.46              |
| 9033      | SEB     |    | day 7      | TIIV    | 309.56                   | 20.13           | 329.69             |
| 9033      | medium  |    | day 28     | TIIV    | 0.00                     | 0.00            | 0.00               |
| 9033      | H1N1    |    | day 28     | TIIV    | 49.25                    | 0.00            | 49.25              |

|             |        |      |        |        |        |
|-------------|--------|------|--------|--------|--------|
| 9033 SEB    | day 28 | TIIV | 196.80 | 10.40  | 207.20 |
| 9035 medium | day 0  | TIIV | 0.00   | 0.00   | 0.00   |
| 9035 H1N1   | day 0  | TIIV | 50.42  | 25.86  | 76.28  |
| 9035 SEB    | day 0  | TIIV | 402.30 | 65.48  | 467.78 |
| 9035 medium | day 7  | TIIV | 0.00   | 0.00   | 0.00   |
| 9035 H1N1   | day 7  | TIIV | 221.50 | 10.10  | 231.60 |
| 9035 SEB    | day 7  | TIIV | 292.60 | 24.20  | 316.80 |
| 9035 medium | day 28 | TIIV | 0.00   | 0.00   | 0.00   |
| 9035 H1N1   | day 28 | TIIV | 83.80  | 21.80  | 105.60 |
| 9035 SEB    | day 28 | TIIV | 168.60 | 26.00  | 194.60 |
| 9045 medium | day 0  | TIIV | 0.00   | 0.00   | 0.00   |
| 9045 H1N1   | day 0  | TIIV | 36.50  | 0.00   | 36.50  |
| 9045 SEB    | day 0  | TIIV | 924.00 | 42.00  | 966.00 |
| 9045 medium | day 7  | TIIV | 0.00   | 0.00   | 0.00   |
| 9045 H1N1   | day 7  | TIIV | 23.70  | 47.50  | 71.20  |
| 9045 SEB    | day 7  | TIIV | 564.80 | 62.80  | 627.60 |
| 9045 medium | day 28 | TIIV | 0.00   | 0.00   | 0.00   |
| 9045 H1N1   | day 28 | TIIV | 35.32  | 0.00   | 35.32  |
| 9045 SEB    | day 28 | TIIV | 647.30 | 92.30  | 739.60 |
| 9051 medium | day 0  | TIIV | 0.00   | 0.00   | 0.00   |
| 9051 H1N1   | day 0  | TIIV | 23.75  | 4.79   | 28.54  |
| 9051 SEB    | day 0  | TIIV | 95.50  | 382.00 | 477.50 |
| 9051 medium | day 7  | TIIV | 0.00   | 0.00   | 0.00   |
| 9051 H1N1   | day 7  | TIIV | 15.46  | 0.00   | 15.46  |
| 9051 SEB    | day 7  | TIIV | 344.50 | 71.70  | 416.20 |
| 9051 medium | day 28 | TIIV | 0.00   | 0.00   | 0.00   |
| 9051 H1N1   | day 28 | TIIV | 46.02  | 5.76   | 51.78  |
| 9051 SEB    | day 28 | TIIV | 425.92 | 64.62  | 490.54 |
| 9055 medium | day 0  | TIIV | 0.00   | 0.00   | 0.00   |
| 9055 H1N1   | day 0  | TIIV | 16.37  | 0.00   | 16.37  |
| 9055 SEB    | day 0  | TIIV | 251.51 | 24.52  | 276.03 |
| 9055 medium | day 7  | TIIV | 0.00   | 0.00   | 0.00   |
| 9055 H1N1   | day 7  | TIIV | 26.42  | 4.41   | 30.83  |
| 9055 SEB    | day 7  | TIIV | 331.00 | 45.36  | 376.36 |
| 9055 medium | day 28 | TIIV | 0.00   | 0.00   | 0.00   |
| 9055 H1N1   | day 28 | TIIV | 5.98   | 5.98   | 11.96  |
| 9055 SEB    | day 28 | TIIV | 190.19 | 11.18  | 201.37 |
| 9057 medium | day 0  | TIIV | 0.00   | 0.00   | 0.00   |
| 9057 H1N1   | day 0  | TIIV | 0.00   | 0.00   | 0.00   |
| 9057 SEB    | day 0  | TIIV | 203.10 | 13.50  | 216.60 |
| 9057 medium | day 7  | TIIV | 0.00   | 0.00   | 0.00   |
| 9057 H1N1   | day 7  | TIIV | 0.00   | 0.00   | 0.00   |
| 9057 SEB    | day 7  | TIIV | 158.40 | 22.60  | 181.00 |
| 9057 medium | day 28 | TIIV | 0.00   | 0.00   | 0.00   |
| 9057 H1N1   | day 28 | TIIV | 10.10  | 0.00   | 10.10  |
| 9057 SEB    | day 28 | TIIV | 103.92 | 0.00   | 103.92 |
| 9061 medium | day 0  | TIIV | 0.00   | 0.00   | 0.00   |
| 9061 H1N1   | day 0  | TIIV | 27.38  | 0.00   | 27.38  |
| 9061 SEB    | day 0  | TIIV | 279.80 | 0.00   | 279.80 |
| 9061 medium | day 7  | TIIV | 0.00   | 0.00   | 0.00   |
| 9061 H1N1   | day 7  | TIIV | 225.50 | 16.50  | 242.00 |
| 9061 SEB    | day 7  | TIIV | 545.90 | 47.70  | 593.60 |
| 9061 medium | day 28 | TIIV | 0.00   | 0.00   | 0.00   |
| 9061 H1N1   | day 28 | TIIV | 42.28  | 8.46   | 50.74  |
| 9061 SEB    | day 28 | TIIV | 306.00 | 54.00  | 360.00 |
| 9062 medium | day 0  | TIIV | 0.00   | 0.00   | 0.00   |

|             |        |       |        |       |        |
|-------------|--------|-------|--------|-------|--------|
| 9062 H1N1   | day 0  | TIIV  | 0.00   | 3.14  | 3.14   |
| 9062 SEB    | day 0  | TIIV  | 180.44 | 11.52 | 191.96 |
| 9062 medium | day 7  | TIIV  | 0.00   | 0.00  | 0.00   |
| 9062 H1N1   | day 7  | TIIV  | 38.41  | 2.95  | 41.36  |
| 9062 SEB    | day 7  | TIIV  | 101.80 | 0.00  | 101.80 |
| 9062 medium | day 28 | TIIV  | 0.00   | 0.00  | 0.00   |
| 9062 H1N1   | day 28 | TIIV  | 21.43  | 0.00  | 21.43  |
| 9062 SEB    | day 28 | TIIV  | 0.00   | 0.00  | 0.00   |
| 9065 medium | day 0  | TIIV  | 0.00   | 0.00  | 0.00   |
| 9065 H1N1   | day 0  | TIIV  | 10.38  | 0.00  | 10.38  |
| 9065 SEB    | day 0  | TIIV  | 0.00   | 0.00  | 0.00   |
| 9065 medium | day 7  | TIIV  | 0.00   | 0.00  | 0.00   |
| 9065 H1N1   | day 7  | TIIV  | 83.30  | 29.40 | 112.70 |
| 9065 SEB    | day 7  | TIIV  | 418.00 | 0.00  | 418.00 |
| 9065 medium | day 28 | TIIV  | 0.00   | 0.00  | 0.00   |
| 9065 H1N1   | day 28 | TIIV  | 39.89  | 0.00  | 39.89  |
| 9065 SEB    | day 28 | TIIV  | 396.86 | 17.83 | 414.69 |
| 9071 medium | day 0  | TIIV  | 0.00   | 0.00  | 0.00   |
| 9071 H1N1   | day 0  | TIIV  | 5.25   | 0.00  | 5.25   |
| 9071 SEB    | day 0  | TIIV  | 250.63 | 4.65  | 255.28 |
| 9071 medium | day 7  | TIIV  | 0.00   | 0.00  | 0.00   |
| 9071 H1N1   | day 7  | TIIV  | 91.18  | 4.80  | 95.98  |
| 9071 SEB    | day 7  | TIIV  | 345.34 | 7.04  | 352.38 |
| 9071 medium | day 28 | TIIV  | 0.00   | 0.00  | 0.00   |
| 9071 H1N1   | day 28 | TIIV  | 30.16  | 0.00  | 30.16  |
| 9071 SEB    | day 28 | TIIV  | 168.20 | 18.68 | 186.88 |
| 9083 medium | day 0  | TIIV  | 0.00   | 0.00  | 0.00   |
| 9083 H1N1   | day 0  | TIIV  | 4.44   | 0.00  | 4.44   |
| 9083 SEB    | day 0  | TIIV  | 224.70 | 11.20 | 235.90 |
| 9083 medium | day 7  | TIIV  | 0.00   | 0.00  | 0.00   |
| 9083 H1N1   | day 7  | TIIV  | 306.64 | 55.22 | 361.86 |
| 9083 SEB    | day 7  | TIIV  | 314.66 | 36.16 | 350.82 |
| 9083 medium | day 28 | TIIV  | 0.00   | 0.00  | 0.00   |
| 9083 H1N1   | day 28 | TIIV  | 55.80  | 12.40 | 68.20  |
| 9083 SEB    | day 28 | TIIV  | 182.01 | 0.00  | 182.01 |
| 9004 Medium | day 0  | TIIV  | 0.00   | 0.00  | 0.00   |
| 9004 H1N1   | day 0  | TIIV  | 24.20  | 0.00  | 24.20  |
| 9004 SEB    | day 0  | TIIV  | 364.80 | 0.00  | 364.80 |
| 9004 Medium | day 7  | TIIV  | 0.00   | 0.00  | 0.00   |
| 9004 H1N1   | day 7  | TIIV  | 126.70 | 18.14 | 144.84 |
| 9004 SEB    | day 7  | TIIV  | 481.04 | 22.94 | 503.98 |
| 9004 Medium | day 28 | TIIV  | 0.00   | 0.00  | 0.00   |
| 9004 H1N1   | day 28 | TIIV  | 72.11  | 9.01  | 81.12  |
| 9004 SEB    | day 28 | TIIV  | 214.50 | 0.00  | 214.50 |
| 9091 Medium | day 0  | TIIV  | 0.00   | 0.00  | 0.00   |
| 9091 H1N1   | day 0  | TIIV  | 53.78  | 7.68  | 61.46  |
| 9091 SEB    | day 0  | TIIV  | 14.72  | 0.00  | 14.72  |
| 9091 Medium | day 7  | TIIV  | 0.00   | 0.00  | 0.00   |
| 9091 H1N1   | day 7  | TIIV  | 5.87   | 5.87  | 11.74  |
| 9091 SEB    | day 7  | TIIV  | 19.33  | 6.43  | 25.76  |
| 9091 Medium | day 28 | TIIV  | 0.00   | 0.00  | 0.00   |
| 9091 H1N1   | day 28 | TIIV  | 0.00   | 0.00  | 0.00   |
| 9091 SEB    | day 28 | TIIV  | 10.78  | 0.00  | 10.78  |
| 9073 Medium | day 0  | ATIIV | 0.00   | 0.00  | 0.00   |
| 9073 H1N1   | day 0  | ATIIV | 18.80  | 9.42  | 28.22  |
| 9073 SEB    | day 0  | ATIIV | 417.99 | 0.00  | 417.99 |

|             |        |       |         |        |         |
|-------------|--------|-------|---------|--------|---------|
| 9073 Medium | day 7  | ATIIV | 0.00    | 0.00   | 0.00    |
| 9073 H1N1   | day 7  | ATIIV | 205.28  | 115.72 | 321.00  |
| 9073 SEB    | day 7  | ATIIV | 569.27  | 40.18  | 609.45  |
| 9073 Medium | day 28 | ATIIV | 0.00    | 0.00   | 0.00    |
| 9073 H1N1   | day 28 | ATIIV | 45.63   | 7.61   | 53.24   |
| 9073 SEB    | day 28 | ATIIV | 228.71  | 15.22  | 243.93  |
| 9078 Medium | day 0  | ATIIV | 0.00    | 0.00   | 0.00    |
| 9078 H1N1   | day 0  | ATIIV | 10.50   | 0.00   | 10.50   |
| 9078 SEB    | day 0  | ATIIV | 318.00  | 159.00 | 477.00  |
| 9078 Medium | day 7  | ATIIV | 0.00    | 0.00   | 0.00    |
| 9078 H1N1   | day 7  | ATIIV | 114.92  | 0.00   | 114.92  |
| 9078 SEB    | day 7  | ATIIV | 467.01  | 14.80  | 481.81  |
| 9078 Medium | day 28 | ATIIV | 0.00    | 0.00   | 0.00    |
| 9078 H1N1   | day 28 | ATIIV | 23.80   | 0.00   | 23.80   |
| 9078 SEB    | day 28 | ATIIV | 309.22  | 0.00   | 309.22  |
| 9010 medium | day 0  | ATIIV | 0.00    | 0.00   | 0.00    |
| 9010 H1N1   | day 0  | ATIIV | 39.24   | 4.87   | 44.11   |
| 9010 SEB    | day 0  | ATIIV | 0.00    | 0.00   | 0.00    |
| 9010 medium | day 7  | ATIIV | 0.00    | 0.00   | 0.00    |
| 9010 H1N1   | day 7  | ATIIV | 174.24  | 10.88  | 185.12  |
| 9010 SEB    | day 7  | ATIIV | 455.00  | 16.62  | 471.62  |
| 9010 medium | day 28 | ATIIV | 0.00    | 0.00   | 0.00    |
| 9010 H1N1   | day 28 | ATIIV | 29.03   | 0.00   | 29.03   |
| 9010 SEB    | day 28 | ATIIV | 99.85   | 0.00   | 99.85   |
| 9026 medium | day 0  | ATIIV | 0.00    | 0.00   | 0.00    |
| 9026 H1N1   | day 0  | ATIIV | 77.06   | 3.31   | 80.37   |
| 9026 SEB    | day 0  | ATIIV | 487.28  | 46.59  | 533.87  |
| 9026 medium | day 7  | ATIIV | 0.00    | 0.00   | 0.00    |
| 9026 H1N1   | day 7  | ATIIV | 234.35  | 6.43   | 240.78  |
| 9026 SEB    | day 7  | ATIIV | 1092.75 | 43.00  | 1135.75 |
| 9026 medium | day 28 | ATIIV | 0.00    | 0.00   | 0.00    |
| 9026 H1N1   | day 28 | ATIIV | 211.90  | 11.45  | 223.35  |
| 9026 SEB    | day 28 | ATIIV | 618.40  | 129.68 | 748.08  |
| 9031 MEDIUM | day 0  | ATIIV | 0.00    | 0.00   | 0.00    |
| 9031 H1N1   | day 0  | ATIIV | 66.73   | 0.00   | 66.73   |
| 9031 SEB    | day 0  | ATIIV | 190.76  | 8.54   | 199.30  |
| 9031 MEDIUM | day 7  | ATIIV | 0.00    | 0.00   | 0.00    |
| 9031 H1N1   | day 7  | ATIIV | 128.44  | 24.19  | 152.63  |
| 9031 SEB    | day 7  | ATIIV | 640.20  | 28.15  | 668.35  |
| 9031 MEDIUM | day 28 | ATIIV | 0.00    | 0.00   | 0.00    |
| 9031 H1N1   | day 28 | ATIIV | 134.04  | 11.34  | 145.38  |
| 9031 SEB    | day 28 | ATIIV | 300.14  | 26.70  | 326.84  |
| 9041 MEDIUM | day 0  | ATIIV | 0.00    | 0.00   | 0.00    |
| 9041 H1N1   | day 0  | ATIIV | 215.50  | 19.85  | 235.35  |
| 9041 SEB    | day 0  | ATIIV | 460.60  | 26.40  | 487.00  |
| 9041 MEDIUM | day 7  | ATIIV | 0.00    | 0.00   | 0.00    |
| 9041 H1N1   | day 7  | ATIIV | 1489.29 | 33.86  | 1523.15 |
| 9041 SEB    | day 7  | ATIIV | 401.76  | 37.48  | 439.24  |
| 9041 MEDIUM | day 28 | ATIIV | 0.00    | 0.00   | 0.00    |
| 9041 H1N1   | day 28 | ATIIV | 506.17  | 23.85  | 530.02  |
| 9041 SEB    | day 28 | ATIIV | 311.00  | 0.00   | 311.00  |
| 9043 MEDIUM | day 0  | ATIIV | 0.00    | 0.00   | 0.00    |
| 9043 H1N1   | day 0  | ATIIV | 63.20   | 10.60  | 73.80   |
| 9043 SEB    | day 0  | ATIIV | 1013.40 | 36.96  | 1050.36 |
| 9043 MEDIUM | day 7  | ATIIV | 0.00    | 0.00   | 0.00    |
| 9043 H1N1   | day 7  | ATIIV | 266.59  | 56.33  | 322.92  |

|             |        |       |         |        |         |
|-------------|--------|-------|---------|--------|---------|
| 9043 SEB    | day 7  | ATIIV | 1370.09 | 138.20 | 1508.29 |
| 9043 MEDIUM | day 28 | ATIIV | 0.00    | 0.00   | 0.00    |
| 9043 H1N1   | day 28 | ATIIV | 135.80  | 18.58  | 154.38  |
| 9043 SEB    | day 28 | ATIIV | 1027.90 | 0.00   | 1027.90 |
| 9044 MEDIUM | day 0  | ATIIV | 0.00    | 0.00   | 0.00    |
| 9044 H1N1   | day 0  | ATIIV | 124.80  | 31.20  | 156.00  |
| 9044 SEB    | day 0  | ATIIV | 2114.70 | 177.10 | 2291.80 |
| 9044 MEDIUM | day 7  | ATIIV | 0.00    | 0.00   | 0.00    |
| 9044 H1N1   | day 7  | ATIIV | 672.60  | 72.80  | 745.40  |
| 9044 SEB    | day 7  | ATIIV | 1597.10 | 34.70  | 1631.80 |
| 9044 MEDIUM | day 28 | ATIIV | 0.00    | 0.00   | 0.00    |
| 9044 H1N1   | day 28 | ATIIV | 188.50  | 14.00  | 202.50  |
| 9044 SEB    | day 28 | ATIIV | 584.10  | 0.00   | 584.10  |
| 9046 MEDIUM | day 0  | ATIIV | 0.00    | 0.00   | 0.00    |
| 9046 H1N1   | day 0  | ATIIV | 19.96   | 4.99   | 24.95   |
| 9046 SEB    | day 0  | ATIIV | 238.10  | 18.30  | 256.40  |
| 9046 MEDIUM | day 7  | ATIIV | 0.00    | 0.00   | 0.00    |
| 9046 H1N1   | day 7  | ATIIV | 28.15   | 0.00   | 28.15   |
| 9046 SEB    | day 7  | ATIIV | 592.74  | 47.80  | 640.54  |
| 9046 MEDIUM | day 28 | ATIIV | 0.00    | 0.00   | 0.00    |
| 9046 H1N1   | day 28 | ATIIV | 133.33  | 0.00   | 133.33  |
| 9046 SEB    | day 28 | ATIIV | 297.00  | 0.00   | 297.00  |
| 9050 Medium | day 0  | ATIIV | 0.00    | 0.00   | 0.00    |
| 9050 H1N1   | day 0  | ATIIV | 8.78    | 0.00   | 8.78    |
| 9050 SEB    | day 0  | ATIIV | 92.60   | 4.87   | 97.47   |
| 9050 Medium | day 7  | ATIIV | 0.00    | 0.00   | 0.00    |
| 9050 H1N1   | day 7  | ATIIV | 5.80    | 0.00   | 5.80    |
| 9050 SEB    | day 7  | ATIIV | 50.11   | 0.00   | 50.11   |
| 9050 Medium | day 28 | ATIIV | 0.00    | 0.00   | 0.00    |
| 9050 H1N1   | day 28 | ATIIV | 0.00    | 0.00   | 0.00    |
| 9050 SEB    | day 28 | ATIIV | 33.85   | 0.00   | 33.85   |
| 9056 Medium | day 0  | ATIIV | 0.00    | 0.00   | 0.00    |
| 9056 H1N1   | day 0  | ATIIV | 36.42   | 0.00   | 36.42   |
| 9056 SEB    | day 0  | ATIIV | 344.50  | 20.30  | 364.80  |
| 9056 Medium | day 7  | ATIIV | 0.00    | 0.00   | 0.00    |
| 9056 H1N1   | day 7  | ATIIV | 55.47   | 0.00   | 55.47   |
| 9056 SEB    | day 7  | ATIIV | 592.70  | 31.20  | 623.90  |
| 9056 Medium | day 28 | ATIIV | 0.00    | 0.00   | 0.00    |
| 9056 H1N1   | day 28 | ATIIV | 40.50   | 0.00   | 40.50   |
| 9056 SEB    | day 28 | ATIIV | 1494.00 | 0.00   | 1494.00 |
| 9063 Medium | day 0  | ATIIV | 0.00    | 0.00   | 0.00    |
| 9063 H1N1   | day 0  | ATIIV | 27.49   | 3.93   | 31.42   |
| 9063 SEB    | day 0  | ATIIV | 192.37  | 12.27  | 204.64  |
| 9063 Medium | day 7  | ATIIV | 0.00    | 0.00   | 0.00    |
| 9063 H1N1   | day 7  | ATIIV | 171.84  | 22.41  | 194.25  |
| 9063 SEB    | day 7  | ATIIV | 434.00  | 0.00   | 434.00  |
| 9063 Medium | day 28 | ATIIV | 0.00    | 0.00   | 0.00    |
| 9063 H1N1   | day 28 | ATIIV | 62.89   | 0.00   | 62.89   |
| 9063 SEB    | day 28 | ATIIV | 254.80  | 0.00   | 254.80  |
| 9066 Medium | day 0  | ATIIV | 0.00    | 0.00   | 0.00    |
| 9066 H1N1   | day 0  | ATIIV | 33.80   | 0.00   | 33.80   |
| 9066 SEB    | day 0  | ATIIV | 286.68  | 9.88   | 296.56  |
| 9066 Medium | day 7  | ATIIV | 0.00    | 0.00   | 0.00    |
| 9066 H1N1   | day 7  | ATIIV | 372.30  | 6.31   | 378.61  |
| 9066 SEB    | day 7  | ATIIV | 1001.83 | 16.93  | 1018.76 |
| 9066 Medium | day 28 | ATIIV | 0.00    | 0.00   | 0.00    |

|             |        |         |         |       |         |
|-------------|--------|---------|---------|-------|---------|
| 9066 H1N1   | day 28 | ATIIV   | 99.40   | 7.09  | 106.49  |
| 9066 SEB    | day 28 | ATIIV   | 937.80  | 20.10 | 957.90  |
| 9068 Medium | day 0  | ATIIV   | 0.00    | 0.00  | 0.00    |
| 9068 H1N1   | day 0  | ATIIV   | 5.49    | 0.00  | 5.49    |
| 9068 SEB    | day 0  | ATIIV   | 103.68  | 0.00  | 103.68  |
| 9068 Medium | day 7  | ATIIV   | 0.00    | 0.00  | 0.00    |
| 9068 H1N1   | day 7  | ATIIV   | 250.40  | 13.40 | 263.80  |
| 9068 SEB    | day 7  | ATIIV   | 434.90  | 24.50 | 459.40  |
| 9068 Medium | day 28 | ATIIV   | 0.00    | 0.00  | 0.00    |
| 9068 H1N1   | day 28 | ATIIV   | 33.14   | 0.00  | 33.14   |
| 9068 SEB    | day 28 | ATIIV   | 205.87  | 5.41  | 211.28  |
| 9069 Medium | day 0  | ATIIV   | 0.00    | 0.00  | 0.00    |
| 9069 H1N1   | day 0  | ATIIV   | 15.17   | 3.79  | 18.96   |
| 9069 SEB    | day 0  | ATIIV   | 549.27  | 12.24 | 561.51  |
| 9069 Medium | day 7  | ATIIV   | 0.00    | 0.00  | 0.00    |
| 9069 H1N1   | day 7  | ATIIV   | 119.22  | 0.00  | 119.22  |
| 9069 SEB    | day 7  | ATIIV   | 172.42  | 0.00  | 172.42  |
| 9069 Medium | day 28 | ATIIV   | 0.00    | 0.00  | 0.00    |
| 9069 H1N1   | day 28 | ATIIV   | 38.03   | 0.00  | 38.03   |
| 9069 SEB    | day 28 | ATIIV   | 757.98  | 18.70 | 776.68  |
| 9082 Medium | day 0  | ATIIV   | 0.00    | 0.00  | 0.00    |
| 9082 H1N1   | day 0  | ATIIV   | 28.40   | 0.00  | 28.40   |
| 9082 SEB    | day 0  | ATIIV   | 1069.50 | 80.20 | 1149.70 |
| 9082 Medium | day 7  | ATIIV   | 0.00    | 0.00  | 0.00    |
| 9082 H1N1   | day 7  | ATIIV   | 140.96  | 7.83  | 148.79  |
| 9082 SEB    | day 7  | ATIIV   | 929.40  | 44.98 | 974.38  |
| 9082 Medium | day 28 | ATIIV   | 0.00    | 0.00  | 0.00    |
| 9082 H1N1   | day 28 | ATIIV   | 93.60   | 0.00  | 93.60   |
| 9082 SEB    | day 28 | ATIIV   | 1012.50 | 34.20 | 1046.70 |
| 9088 Medium | day 0  | ATIIV   | 0.00    | 0.00  | 0.00    |
| 9088 H1N1   | day 0  | ATIIV   | 12.90   | 12.86 | 25.76   |
| 9088 SEB    | day 0  | ATIIV   | 1038.58 | 97.76 | 1136.34 |
| 9088 Medium | day 7  | ATIIV   | 0.00    | 0.00  | 0.00    |
| 9088 H1N1   | day 7  | ATIIV   | 17.37   | 0.00  | 17.37   |
| 9088 SEB    | day 7  | ATIIV   | 295.10  | 5.78  | 300.88  |
| 9088 Medium | day 28 | ATIIV   | 0.00    | 0.00  | 0.00    |
| 9088 H1N1   | day 28 | ATIIV   | 32.15   | 5.35  | 37.50   |
| 9088 SEB    | day 28 | ATIIV   | 1647.90 | 0.00  | 1647.90 |
| 9022 medium | day 0  | Placebo | 0.00    | 0.00  | 0.00    |
| 9022 H1N1   | day 0  | Placebo | 0.00    | 0.00  | 0.00    |
| 9022 SEB    | day 0  | Placebo | 222.90  | 11.40 | 234.30  |
| 9022 medium | day 7  | Placebo | 0.00    | 0.00  | 0.00    |
| 9022 H1N1   | day 7  | Placebo | 0.00    | 0.00  | 0.00    |
| 9022 SEB    | day 7  | Placebo | 146.10  | 24.40 | 170.50  |
| 9022 medium | day 28 | Placebo | 0.00    | 0.00  | 0.00    |
| 9022 H1N1   | day 28 | Placebo | 0.00    | 0.00  | 0.00    |
| 9022 SEB    | day 28 | Placebo | 79.20   | 11.30 | 90.50   |
| 9024 medium | day 0  | Placebo | 0.00    | 0.00  | 0.00    |
| 9024 H1N1   | day 0  | Placebo | 15.36   | 0.00  | 15.36   |
| 9024 SEB    | day 0  | Placebo | 554.80  | 7.20  | 562.00  |
| 9024 medium | day 7  | Placebo | 0.00    | 0.00  | 0.00    |
| 9024 H1N1   | day 7  | Placebo | 18.95   | 0.00  | 18.95   |
| 9024 SEB    | day 7  | Placebo | 443.71  | 0.00  | 443.71  |
| 9024 medium | day 28 | Placebo | 0.00    | 0.00  | 0.00    |
| 9024 H1N1   | day 28 | Placebo | 12.50   | 6.26  | 18.76   |
| 9024 SEB    | day 28 | Placebo | 284.20  | 18.15 | 302.35  |

|             |        |         |         |        |         |
|-------------|--------|---------|---------|--------|---------|
| 9036 medium | day 0  | Placebo | 0.00    | 0.00   | 0.00    |
| 9036 H1N1   | day 0  | Placebo | 11.40   | 11.40  | 22.80   |
| 9036 SEB    | day 0  | Placebo | 312.00  | 78.00  | 390.00  |
| 9036 medium | day 7  | Placebo | 0.00    | 0.00   | 0.00    |
| 9036 H1N1   | day 7  | Placebo | 76.93   | 10.26  | 87.19   |
| 9036 SEB    | day 7  | Placebo | 605.10  | 94.00  | 699.10  |
| 9036 medium | day 28 | Placebo | 0.00    | 0.00   | 0.00    |
| 9036 H1N1   | day 28 | Placebo | 5.20    | 5.20   | 10.40   |
| 9036 SEB    | day 28 | Placebo | 305.50  | 0.00   | 305.50  |
| 9038 medium | day 0  | Placebo | 0.00    | 0.00   | 0.00    |
| 9038 H1N1   | day 0  | Placebo | 182.40  | 12.20  | 194.60  |
| 9038 SEB    | day 0  | Placebo | 797.68  | 25.08  | 822.76  |
| 9038 medium | day 7  | Placebo | 0.00    | 0.00   | 0.00    |
| 9038 H1N1   | day 7  | Placebo | 97.74   | 26.64  | 124.38  |
| 9038 SEB    | day 7  | Placebo | 1046.50 | 121.00 | 1167.50 |
| 9038 medium | day 28 | Placebo | 0.00    | 0.00   | 0.00    |
| 9038 H1N1   | day 28 | Placebo | 159.48  | 0.00   | 159.48  |
| 9038 SEB    | day 28 | Placebo | 344.10  | 0.00   | 344.10  |
| 9074 medium | day 0  | Placebo | 0.00    | 0.00   | 0.00    |
| 9074 H1N1   | day 0  | Placebo | 25.30   | 0.00   | 25.30   |
| 9074 SEB    | day 0  | Placebo | 507.56  | 8.06   | 515.62  |
| 9074 medium | day 7  | Placebo | 0.00    | 0.00   | 0.00    |
| 9074 H1N1   | day 7  | Placebo | 7.24    | 7.24   | 14.48   |
| 9074 SEB    | day 7  | Placebo | 526.31  | 86.51  | 612.82  |
| 9074 medium | day 28 | Placebo | 0.00    | 0.00   | 0.00    |
| 9074 H1N1   | day 28 | Placebo | 27.84   | 6.97   | 34.81   |
| 9074 SEB    | day 28 | Placebo | 896.91  | 99.61  | 996.52  |
| 9080 medium | day 0  | Placebo | 0.00    | 0.00   | 0.00    |
| 9080 H1N1   | day 0  | Placebo | 52.32   | 0.59   | 52.91   |
| 9080 SEB    | day 0  | Placebo | 1877.12 | 111.89 | 1989.01 |
| 9080 medium | day 7  | Placebo | 0.00    | 0.00   | 0.00    |
| 9080 H1N1   | day 7  | Placebo | 37.50   | 0.00   | 37.50   |
| 9080 SEB    | day 7  | Placebo | 1616.16 | 52.90  | 1669.06 |
| 9080 medium | day 28 | Placebo | 0.00    | 0.00   | 0.00    |
| 9080 H1N1   | day 28 | Placebo | 40.80   | 6.82   | 47.62   |
| 9080 SEB    | day 28 | Placebo | 1674.70 | 20.20  | 1694.90 |
| 9081 medium | day 0  | Placebo | 0.00    | 0.00   | 0.00    |
| 9081 H1N1   | day 0  | Placebo | 49.87   | 0.00   | 49.87   |
| 9081 SEB    | day 0  | Placebo | 582.80  | 28.20  | 611.00  |
| 9081 medium | day 7  | Placebo | 0.00    | 0.00   | 0.00    |
| 9081 H1N1   | day 7  | Placebo | 11.81   | 7.66   | 19.47   |
| 9081 SEB    | day 7  | Placebo | 936.36  | 95.82  | 1032.18 |
| 9081 medium | day 28 | Placebo | 0.00    | 0.00   | 0.00    |
| 9081 H1N1   | day 28 | Placebo | 37.44   | 3.74   | 41.18   |
| 9081 SEB    | day 28 | Placebo | 610.30  | 30.02  | 640.32  |
