# Supplementary material for: Early Rise of Blood T Follicular Helper Cell Subsets and Baseline Immunity as Predictors of Persisting Late Functional Antibody Responses to Vaccination in Humans
Source: PubMed Central journal article supplement (PMC4918887; doi:10.1371/journal.pone.0157066), 2016-06-23
Supplement: pone.0157066.s011.pdf [file pone.0157066.s011.pdf]

S5 Table Frequency of Ex vivo CD4 T cells /10<sup>6</sup> PBMCs

| SAMPLE ID | Vaccination | Visit  | CD4+ICOS+CXCR5+ | CD4+ICOS+CX5+CXCR3+ | CD4+CX5+CXCR3+PD1+ |
|-----------|-------------|--------|-----------------|---------------------|--------------------|
| 9004      | TIIV        | Day 0  | 1702.70         | 391.89              | 2828.83            |
| 9004      | TIIV        | Day 7  | 7431.62         | 4188.03             | 4423.08            |
| 9004      | TIIV        | Day 28 | 940.74          | 207.41              | 1377.78            |
| 9017      | TIIV        | day 0  | 1662.39         | 256.41              | 871.79             |
| 9017      | TIIV        | day 7  | 3970.69         | 1746.55             | 1737.93            |
| 9017      | TIIV        | day 28 | 754.11          | 120.22              | 524.60             |
| 9018      | TIIV        | day 0  | 1086.14         | 344.57              | 1314.61            |
| 9018      | TIIV        | day 7  | 1579.44         | 588.79              | 1233.64            |
| 9018      | TIIV        | day 28 | 629.96          | 66.08               | 348.02             |
| 9021      | TIIV        | day 0  | 2351.17         | 1066.89             | 3120.40            |
| 9021      | TIIV        | day 7  | 2860.93         | 1665.56             | 2655.63            |
| 9021      | TIIV        | day 28 | 1782.61         | 663.04              | 2068.84            |
| 9027      | TIIV        | day 0  | 1242.90         | 397.48              | 1716.09            |
| 9027      | TIIV        | day 7  | 3334.48         | 2106.90             | 2700.00            |
| 9027      | TIIV        | day 28 | 691.63          | 277.53              | 1123.35            |
| 9028      | TIIV        | day 0  | 3223.12         | 754.56              | 3464.50            |
| 9028      | TIIV        | day 7  | 7882.35         | 3851.93             | 5630.83            |
| 9028      | TIIV        | day 28 | 1586.28         | 241.15              | 1727.88            |
| 9033      | TIIV        | day 0  | 759.09          | 433.76              | 2125.44            |
| 9033      | TIIV        | day 7  | 2970.27         | 2116.22             | 3335.14            |
| 9033      | TIIV        | day 28 | 537.19          | 74.38               | 347.11             |
| 9035      | TIIV        | day 0  | 3002.32         | 392.11              | 2062.65            |
| 9035      | TIIV        | day 7  | 2336.81         | 540.17              | 2090.21            |
| 9035      | TIIV        | day 28 | 1949.58         | 243.70              | 1462.18            |
| 9045      | TIIV        | day 0  | 789.16          | 228.92              | 807.23             |
| 9045      | TIIV        | day 7  | 4740.74         | 2703.70             | 3177.78            |
| 9045      | TIIV        | day 28 | 663.61          | 180.43              | 1244.65            |
| 9051      | TIIV        | day 0  | 852.86          | 179.84              | 2640.33            |
| 9051      | TIIV        | day 7  | 2097.92         | 941.67              | 2952.08            |
| 9051      | TIIV        | day 28 | 352.58          | 68.04               | 2492.78            |
| 9055      | TIIV        | day 0  | 942.78          | 133.51              | 1103.54            |
| 9055      | TIIV        | day 7  | 2514.14         | 1033.42             | 2321.34            |
| 9055      | TIIV        | day 28 | 987.62          | 321.78              | 2304.46            |
| 9057      | TIIV        | day 0  | 783.51          | 82.47               | 2036.08            |
| 9057      | TIIV        | day 7  | 1486.77         | 592.59              | 3211.64            |
| 9057      | TIIV        | day 28 | 895.03          | 66.30               | 2657.46            |
| 9061      | TIIV        | day 0  | 1464.37         | 457.00              | 2402.95            |
| 9061      | TIIV        | day 7  | 2025.39         | 822.27              | 2933.59            |
| 9061      | TIIV        | day 28 | 949.82          | 125.45              | 1232.97            |
| 9062      | TIIV        | day 0  | 1027.78         | 160.49              | 2117.28            |
| 9062      | TIIV        | day 7  | 2308.47         | 1417.34             | 3864.92            |
| 9062      | TIIV        | day 28 | 692.83          | 219.73              | 2069.51            |
| 9065      | TIIV        | day 0  | 637.50          | 18.75               | 768.75             |
| 9065      | TIIV        | day 7  | 3922.03         | 1555.93             | 3132.20            |
| 9065      | TIIV        | day 28 | 1410.26         | 261.54              | 1892.31            |
| 9071      | TIIV        | day 0  | 670.89          | 151.90              | 623.42             |
| 9071      | TIIV        | day 7  | 1819.35         | 948.39              | 1861.29            |
| 9071      | TIIV        | day 28 | 1212.87         | 361.39              | 1396.04            |
| 9083      | TIIV        | day 0  | 884.00          | 308.00              | 1728.00            |
| 9083      | TIIV        | day 7  | 6748.84         | 4702.33             | 5004.65            |
| 9083      | TIIV        | day 28 | 1811.00         | 814.43              | 2384.88            |
| 9091      | TIIV        | day 0  | 1025.08         | 128.53              | 1125.39            |
| 9091      | TIIV        | day 7  | 1956.24         | 621.44              | 1457.33            |
| 9091      | TIIV        | day 28 | 1356.29         | 154.39              | 1135.39            |

|              |        |          |          |         |
|--------------|--------|----------|----------|---------|
| 9010 ATIIV   | day 0  | 630.37   | 48.71    | 567.34  |
| 9010 ATIIV   | day 7  | 2084.21  | 915.79   | 1136.84 |
| 9010 ATIIV   | day 28 | 383.05   | 47.46    | 325.42  |
| 9026 ATIIV   | day 0  | 522.62   | 144.80   | 886.88  |
| 9026 ATIIV   | day 7  | 972.97   | 509.01   | 1216.22 |
| 9026 ATIIV   | day 28 | 507.85   | 99.48    | 560.21  |
| 9031 ATIIV   | DAY 0  | 1332.32  | 210.37   | 1716.46 |
| 9031 ATIIV   | DAY 7  | 2552.11  | 1270.42  | 2115.49 |
| 9031 ATIIV   | DAY 28 | 1327.49  | 213.45   | 1590.64 |
| 9041 ATIIV   | DAY 0  | 2054.69  | 382.81   | 2113.28 |
| 9041 ATIIV   | DAY 7  | 10300.00 | 6809.09  | 6163.64 |
| 9041 ATIIV   | DAY 28 | 1383.42  | 264.25   | 1823.83 |
| 9043 ATIIV   | DAY 0  | 1315.79  | 240.60   | 2411.03 |
| 9043 ATIIV   | DAY 7  | 15280.19 | 8574.88  | 7545.89 |
| 9043 ATIIV   | DAY 28 | 1374.67  | 234.83   | 1263.85 |
| 9044 ATIIV   | DAY 0  | 1653.98  | 391.00   | 2083.04 |
| 9044 ATIIV   | DAY 7  | 16094.09 | 10557.99 | 7752.74 |
| 9044 ATIIV   | DAY 28 | 1133.90  | 455.84   | 1752.14 |
| 9046 ATIIV   | DAY 0  | 872.61   | 140.13   | 1181.53 |
| 9046 ATIIV   | DAY 7  | 1075.95  | 488.05   | 853.73  |
| 9046 ATIIV   | DAY 28 | 554.43   | 88.61    | 787.34  |
| 9050 ATIIV   | day 0  | 761.57   | 164.35   | 1652.78 |
| 9050 ATIIV   | day 7  | 590.12   | 191.86   | 970.93  |
| 9050 ATIIV   | day 28 | 318.01   | 53.64    | 452.11  |
| 9056 ATIIV   | day 0  | 405.20   | 85.50    | 394.05  |
| 9056 ATIIV   | day 7  | 902.61   | 166.27   | 451.31  |
| 9056 ATIIV   | day 28 | 161.46   | 10.42    | 41.67   |
| 9063 ATIIV   | day 0  | 808.76   | 201.20   | 1826.69 |
| 9063 ATIIV   | day 7  | 3613.29  | 2364.57  | 3904.60 |
| 9063 ATIIV   | day 28 | 853.29   | 155.69   | 1628.74 |
| 9066 ATIIV   | day 0  | 380.95   | 80.59    | 1545.79 |
| 9066 ATIIV   | day 7  | 1125.41  | 561.06   | 3544.55 |
| 9066 ATIIV   | day 28 | 741.38   | 178.16   | 2310.34 |
| 9068 ATIIV   | day 0  | 845.03   | 187.13   | 4239.77 |
| 9068 ATIIV   | day 7  | 11556.49 | 7569.04  | 9000.00 |
| 9068 ATIIV   | day 28 | 1440.37  | 353.21   | 3811.93 |
| 9069 ATIIV   | day 0  | 1732.56  | 207.36   | 2955.43 |
| 9069 ATIIV   | day 7  | 2834.08  | 789.24   | 1206.28 |
| 9069 ATIIV   | day 28 | 2613.64  | 439.39   | 2962.12 |
| 9073 ATIIV   | day 0  | 1127.45  | 411.76   | 1887.25 |
| 9073 ATIIV   | day 7  | 8479.77  | 5352.60  | 6716.76 |
| 9073 ATIIV   | day 28 | 1061.58  | 410.56   | 2577.71 |
| 9078 ATIIV   | day 0  | 635.90   | 51.28    | 512.82  |
| 9078 ATIIV   | day 7  | 1867.47  | 144.58   | 213.86  |
| 9078 ATIIV   | day 28 | 813.29   | 101.27   | 895.57  |
| 9082 ATIIV   | Day 0  | 671.79   | 143.59   | 897.44  |
| 9082 ATIIV   | Day 7  | 4231.25  | 2550.00  | 3131.25 |
| 9082 ATIIV   | Day 28 | 1032.11  | 192.66   | 1261.47 |
| 9088 ATIIV   | Day 0  | 2307.89  | 955.26   | 3065.79 |
| 9088 ATIIV   | Day 7  | 1790.18  | 908.48   | 3229.91 |
| 9088 ATIIV   | Day 28 | 1289.59  | 538.46   | 2298.64 |
| 9022 Placebo | DAY 0  | 1266.22  | 290.83   | 1476.51 |
| 9022 Placebo | DAY 7  | 1830.51  | 474.58   | 1847.46 |
| 9022 Placebo | DAY 28 | 1279.79  | 191.71   | 1222.80 |
| 9024 Placebo | day 0  | 1408.70  | 86.96    | 817.39  |
| 9024 Placebo | day 7  | 1496.77  | 64.52    | 948.39  |

|              |        |         |        |         |
|--------------|--------|---------|--------|---------|
| 9024 Placebo | day 28 | 1439.81 | 97.22  | 768.52  |
| 9036 Placebo | day 0  | 2547.17 | 566.04 | 2477.09 |
| 9036 Placebo | day 7  | 2697.14 | 522.86 | 2408.57 |
| 9036 Placebo | day 28 | 1813.90 | 255.61 | 2334.08 |
| 9038 Placebo | day 0  | 1810.81 | 324.32 | 864.86  |
| 9038 Placebo | day 7  | 1474.79 | 205.88 | 567.23  |
| 9038 Placebo | day 28 | 421.49  | 24.79  | 305.79  |
| 9074 Placebo | day 0  | 844.09  | 107.53 | 876.34  |
| 9074 Placebo | day 7  | 1162.16 | 123.55 | 1563.71 |
| 9074 Placebo | day 28 | 1628.00 | 280.00 | 1644.00 |
| 9080 Placebo | day 0  | 1134.33 | 288.56 | 2920.40 |
| 9080 Placebo | day 7  | 1088.40 | 251.38 | 2306.63 |
| 9080 Placebo | day 28 | 1909.76 | 560.98 | 2848.78 |
| 9081 Placebo | day 0  | 650.15  | 126.93 | 1718.27 |
| 9081 Placebo | day 7  | 1117.85 | 262.63 | 2074.07 |
| 9081 Placebo | day 28 | 1143.22 | 243.72 | 1472.36 |
